# Supplementary material
Source: PubMed Central journal article supplement (PMC5911236)
Supplement: NIHMS949235-supplement.pdf [file NIHMS949235-supplement.pdf]

**A****Probabilistic: Streamline Count**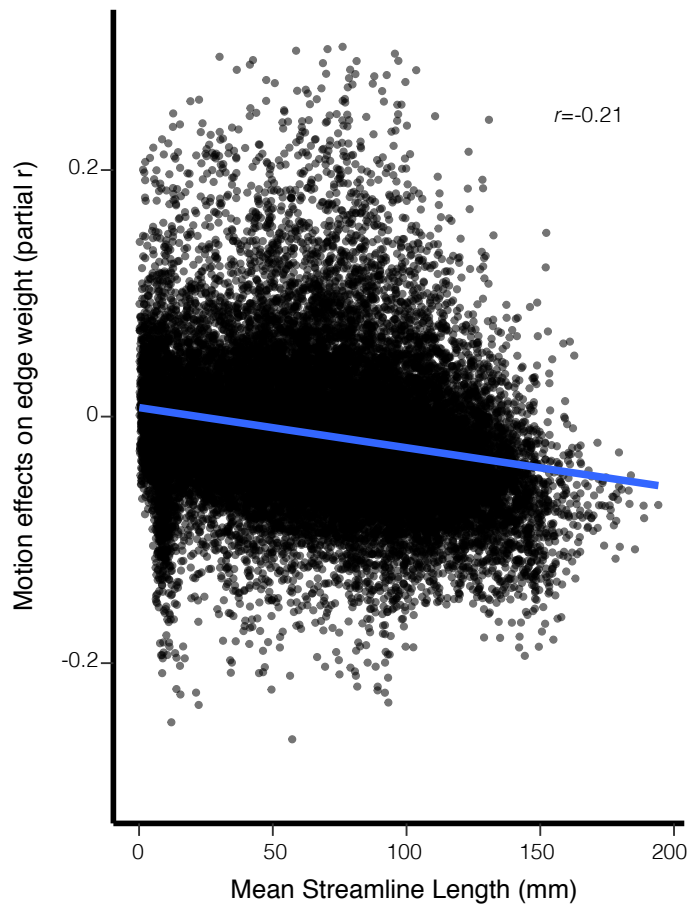**B****Deterministic: Fractional Anisotropy**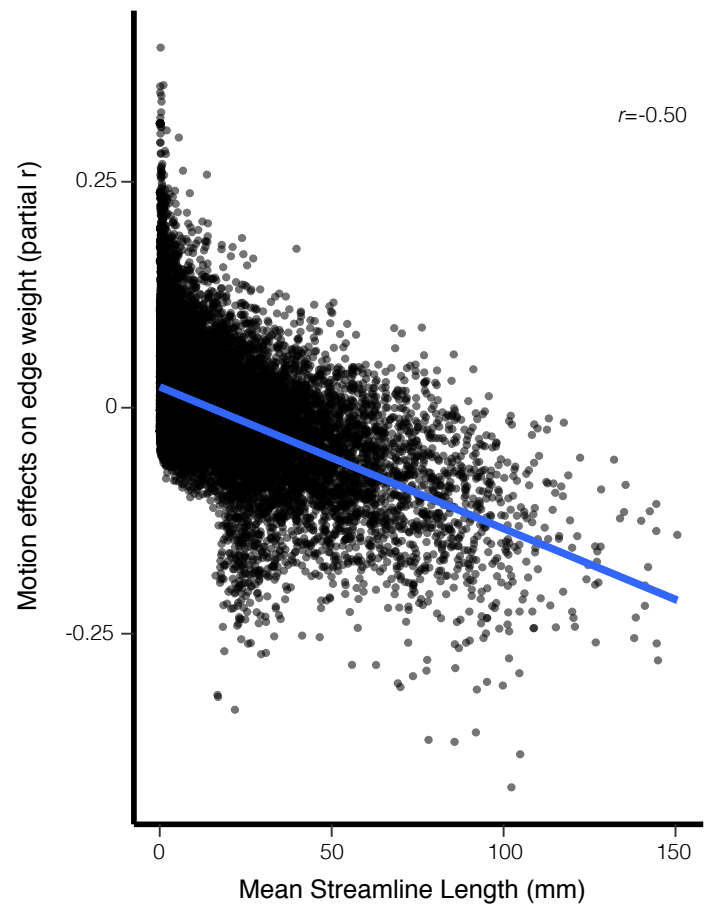**Supplementary Figure 1. Motion effects on structural connectivity are modulated by connection length.**

(A) When edge weights were defined by the probabilistic streamline count, the direction and magnitude of motion effects on edge strength were significantly associated with mean streamline length ( $r=-0.21$ ). (B) When edge weights were defined by the mean fractional anisotropy (FA) of streamlines connecting a node pair, the direction and magnitude of motion effects on edge strength were also significantly associated with mean streamline length ( $r=-0.50$ ). Specifically, head motion was associated with enhanced short-range connectivity and diminished long-range connectivity. The significance of all third-level correlations was evaluated using 10,000 permutations (permutation-based  $p < 0.0001$ ). Blue lines represent a linear fit.

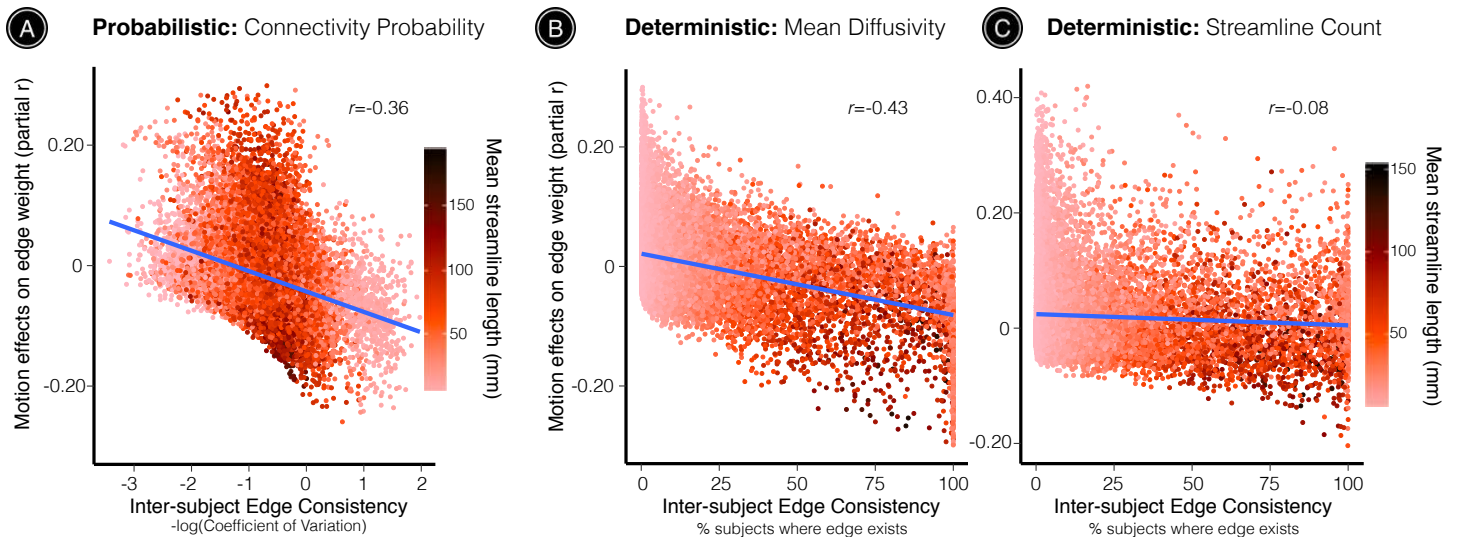

**Supplementary Figure 2. Consistency- and length-driven motion effects using alternative edge weights.** (A) When edge weights were defined by the connectivity probability between two nodes, 13% of all network edges were significantly impacted by motion. The direction and strength of motion effects were significantly associated with inter-subject edge consistency ( $r = -0.36$ ) and mean streamline length ( $r = -0.20$ ). (B) When edge weights were defined by the average inverse mean diffusivity (MD) along streamlines connecting a node pair for brain networks derived from deterministic tractography, 13% of all network edges were significantly impacted by motion. The direction and strength of motion effects were significantly associated with inter-subject edge consistency ( $r = -0.43$ ) and with mean streamline length ( $r = -0.43$ ). (C) When edge weights were defined by the number of deterministic streamlines connecting a pair of nodes, 12% of all network edges were significantly impacted by motion (5% negative effects). While the absolute number of edges impacted by motion was highly consistent with that of other edge weights, motion effects on streamline count-weighted networks were only weakly correlated with inter-subject edge consistency ( $r = -0.08$ ) and with mean streamline length ( $r = -0.17$ ) due to a higher proportion of positive motion effects on edge strength. All statistical inferences were adjusted for multiple comparisons using FDR ( $Q < 0.05$ ). The significance of all third-level correlations was evaluated using 10,000 permutations (permutation-based  $p < 0.0001$ ).

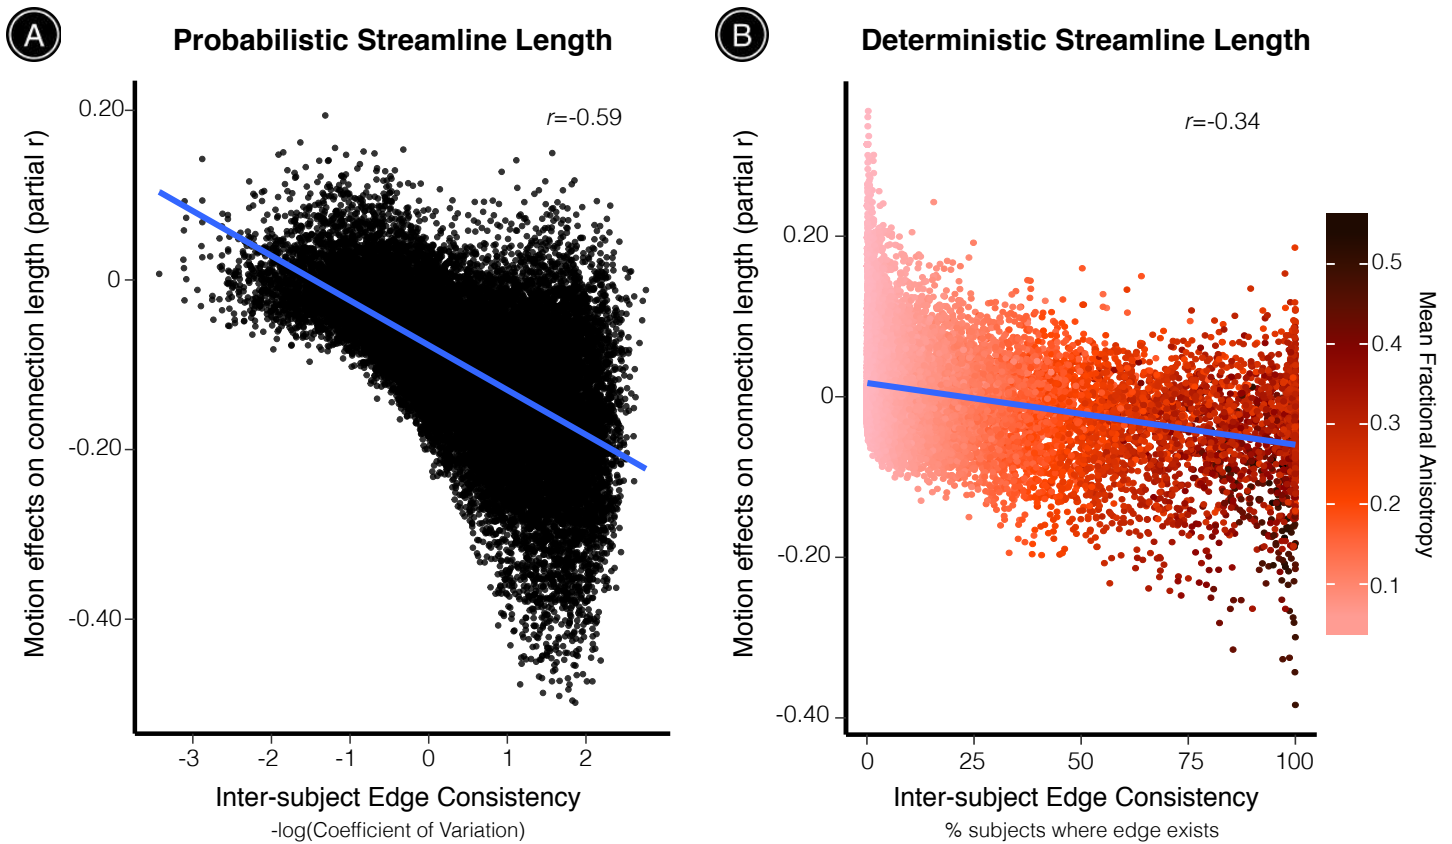

**Supplementary Figure 3. Motion effects on connection length are modulated by inter-subject edge consistency.** (A) When directly evaluating the relationship between head motion and connection length (mean length of probabilistic streamlines connecting a node pair), 62% of all network edges were significantly impacted by motion. The strength and direction of motion effects on connection length were significantly correlated with inter-subject edge consistency ( $r = -0.59$ ). (B) When we evaluated the relationship between head motion and deterministic connection length (mean length of deterministic streamlines connecting a node pair), 10% of all network edges were significantly impacted by motion. The direction and strength of motion effects were significantly associated with inter-subject edge consistency ( $r = -0.34$ ) and with mean FA ( $r = -0.39$ ). Specifically, head motion was associated in increased connection length for low-consistency, low-FA connections, and decreased connection length for high-consistency, high-FA connections. All statistical inferences were adjusted for multiple comparisons using FDR ( $Q < 0.05$ ). The significance of all third-level correlations was evaluated using 10,000 permutations (permutation-based  $p < 0.0001$ ).

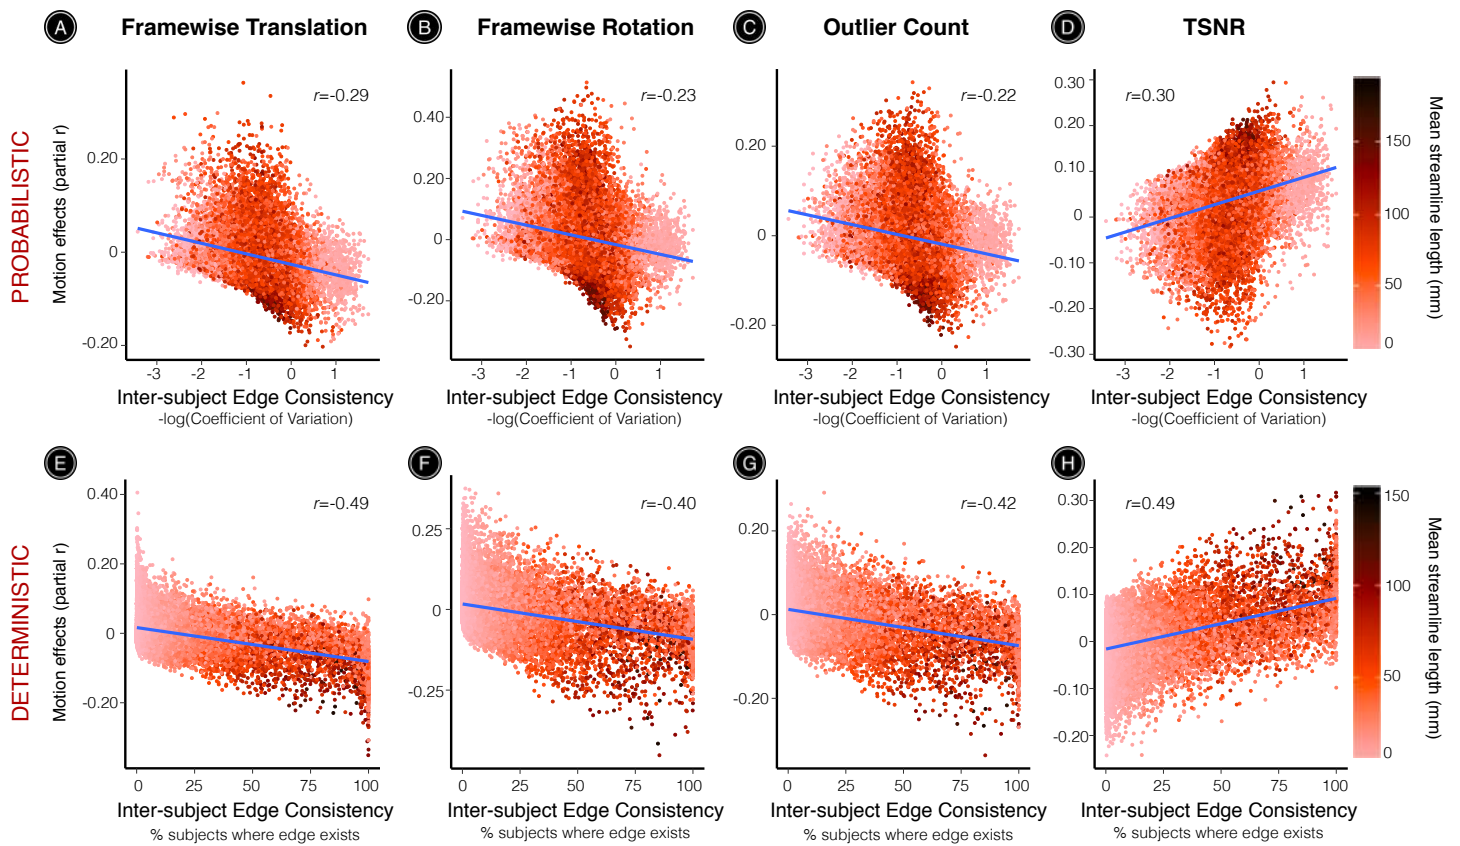

**Supplementary Figure 4. Effects remain highly similar using alternative measures of head motion or DTI data quality.** For networks derived from probabilistic tractography, edge weights were defined by the probabilistic streamline count between each pair of nodes. **(A)** Using the translation component of the affine registration from each volume to the first  $b=0$  volume, we calculated the average magnitude of translation over all 71 volumes in the scan. This measure of framewise translation significantly impacted the strength of 5% of network edges. The direction and strength of these effects on probabilistic streamline count were significantly associated with inter-subject edge consistency ( $r=-0.29$ ) and with mean streamline length ( $r=-0.20$ ). **(B)** Using the rotation component of the affine registration from each volume to the first  $b=0$  volume, we calculated the average magnitude of rotation over all 71 volumes in the scan. This measure of framewise rotation significantly impacted the strength of 28% of network edges. The direction and strength of these effects were significantly associated with inter-subject edge consistency ( $r=-0.23$ ) and mean streamline length ( $r=-0.20$ ). **(C)** The mean voxel outlier count across all 64 diffusion-weighted volumes significantly impacted 13% of network edges. The direction and strength of these effects were significantly associated with inter-subject edge consistency ( $r=-0.22$ ) and mean streamline length ( $r=-0.19$ ). **(D)** The mean temporal signal-to-noise ratio (TSNR) across all 64 diffusion-weighted volumes significantly impacted 25% of network edges. The direction and strength of these effects were significantly associated with inter-subject edge consistency ( $r=0.30$ ) and mean streamline length ( $r=0.20$ ). For networks derived from deterministic tractography, edge weights were defined by the mean fractional anisotropy (FA) along streamlines connecting each pair of nodes. **(E)** Mean framewise translation significantly impacted the strength of 7% of deterministic network edges. The direction and strength of these effects were significantly associated with inter-subject edge consistency ( $r=-0.49$ ) and mean streamline length ( $r=-0.46$ ). **(F)** Mean framewise rotation significantly impacted the strength of 14% of network edges. The direction and strength of these effects were significantly associated with inter-subject edge consistency ( $r=-0.40$ ) and mean streamline length ( $r=-0.42$ ). **(G)** The mean voxel outlier count significantly impacted the strength of 7% of network edges. The direction and strength of these effects were significantly associated with inter-subject edge consistency ( $r=-0.42$ ) and mean streamline length ( $r=-0.42$ ). **(H)** TSNR significantly impacted the strength of 9% of network edges. The direction and strength of these effects were significantly associated with inter-subject edge consistency ( $r=0.49$ ) and mean streamline length ( $r=0.48$ ). All statistical inferences were adjusted for multiple comparisons using FDR ( $Q < 0.05$ ). The significance of all third-level correlations was evaluated using 10,000 permutations (permutation-based  $p < 0.0001$ ).

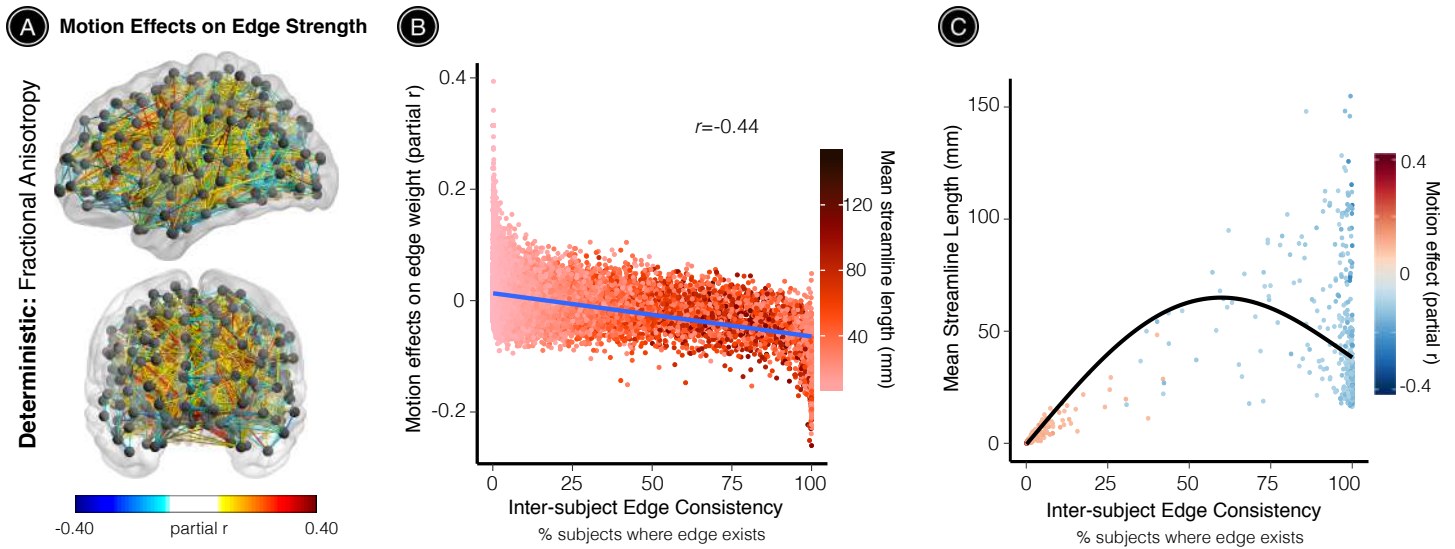

**Supplementary Figure 5. Replacing signal outliers attenuates overall impact of head motion on structural connectivity, but motion effects are still modulated by inter-subject edge consistency and length.** All 949 DTI datasets were reprocessed using a recently-introduced method for simultaneously correcting diffusion images for eddy currents, participant motion, and replacing signal dropout using a non-parametric signal prediction (Andersson et al., 2016). We then fit the diffusion tensor model to the reprocessed DTI data and re-ran deterministic tractography to assess the impact of head motion on structural connectivity. **(A)** When edge weights were defined by the average FA along deterministic streamlines connecting a node pair, only 4% of all network edges were significantly impacted by motion, compared to 14% of edges impacted by motion without outlier replacement. **(B)** While replacing signal outliers attenuated the overall relationship between head motion and structural connectivity, the direction and strength of motion effects were still significantly associated with edge inter-subject consistency ( $r=-0.44$ ) and with mean streamline length ( $r=-0.29$ ). **(C)** As seen previously, inter-subject edge consistency exhibited a parabolic relationship with mean streamline length. Specifically, head motion significantly enhanced the strength of relatively short-range, low-consistency network edges, and diminished the strength of relatively long-range, high-consistency network edges. All statistical inferences were adjusted for multiple comparisons using FDR ( $Q < 0.05$ ). The significance of all third-level correlations was evaluated using 10,000 permutations (permutation-based  $p < 0.0001$ ).
